# Supplementary material
Source: PubMed Central journal article supplement (PMC5577560)
Supplement: NIHMS895705-supplement-Suppl_Info.pdf [file NIHMS895705-supplement-Suppl_Info.pdf]

Supplemental online content for:

## Associations Between End-of-Life Cancer Care Patterns and Medicare Expenditures

*Shi-Yi Wang, MD, PhD; Jane Hall, PhD; Craig E. Pollack, MD; Kerin Adelson, MD; Amy J. Davidoff, PhD; Jessica B. Long, MPH; and Cary P. Gross, MD*

*J Natl Compr Canc Netw 2016;14(8):1001–1008*

- **eAppendix 1:** Sensitivity Analyses Examining Regional Expenditure Variation (Between the Top and Bottom Quintiles) Explained by Intensive End-of-Life Care Indicators
- **eAppendix 2:** Correlations Between Intensive Care Unit Use and Overall Hospitalization at the Hospital Referral Region Level

### eAppendix 1. Sensitivity Analyses Examining Regional Expenditure Variation (Between the Top and Bottom Quintiles) Explained by Intensive End-of-Life Care Indicators

|                                        | Main Model | Sensitivity Analysis 1 <sup>a</sup> | Sensitivity Analysis 2 <sup>b</sup> | Sensitivity Analysis 3 <sup>c</sup> |
|----------------------------------------|------------|-------------------------------------|-------------------------------------|-------------------------------------|
| Percentages explained by the variables |            |                                     |                                     |                                     |
| Late chemotherapy                      | 0.8        | 0.5                                 | 0.4                                 | 0.8                                 |
| Short hospice stay                     | 1.0        | 1.1                                 | 0.4                                 | 0.9                                 |
| Repeated ED visits                     | 18.9       | 19.2                                | 8.6                                 | 18.3                                |
| Repeated hospitalizations              | 21.0       | 23.2                                | 11.1                                | 20.4                                |
| In-hospital death                      | 30.8       | 30.6                                | 17.5                                | 29.5                                |
| ICU use                                | 37.6       | 39.0                                | 21.4                                | 34.3                                |
| All covariates                         | 63.0       | 67.6                                | 31.0                                | 59.1                                |

Abbreviations: ED, emergency department; ICU, intensive care unit.

<sup>a</sup>Including patients who survived 1–36 months after cancer diagnosis.

<sup>b</sup>Using ordinal least squares without log-transformation and winsorization.

<sup>c</sup>Excluding decedents who did not use hospice and did not have provider visits during the last 30 days.

### eAppendix 2. Correlations Between Intensive Care Unit Use and Overall Hospitalization at the Hospital Referral Region Level

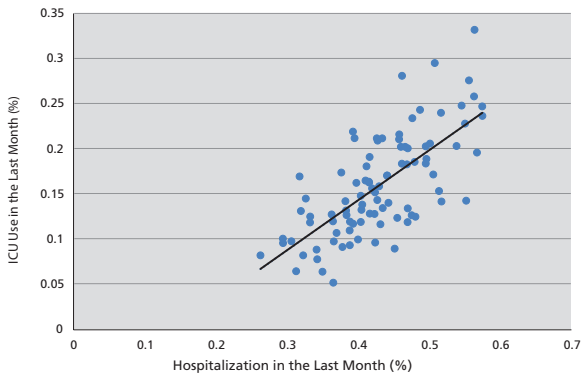

Person correlation coefficient = 0.707;  $P < .001$ .  
Abbreviation: ICU, intensive care unit.
